# Supplementary material
Source: PubMed Central journal article supplement (PMC4700885)

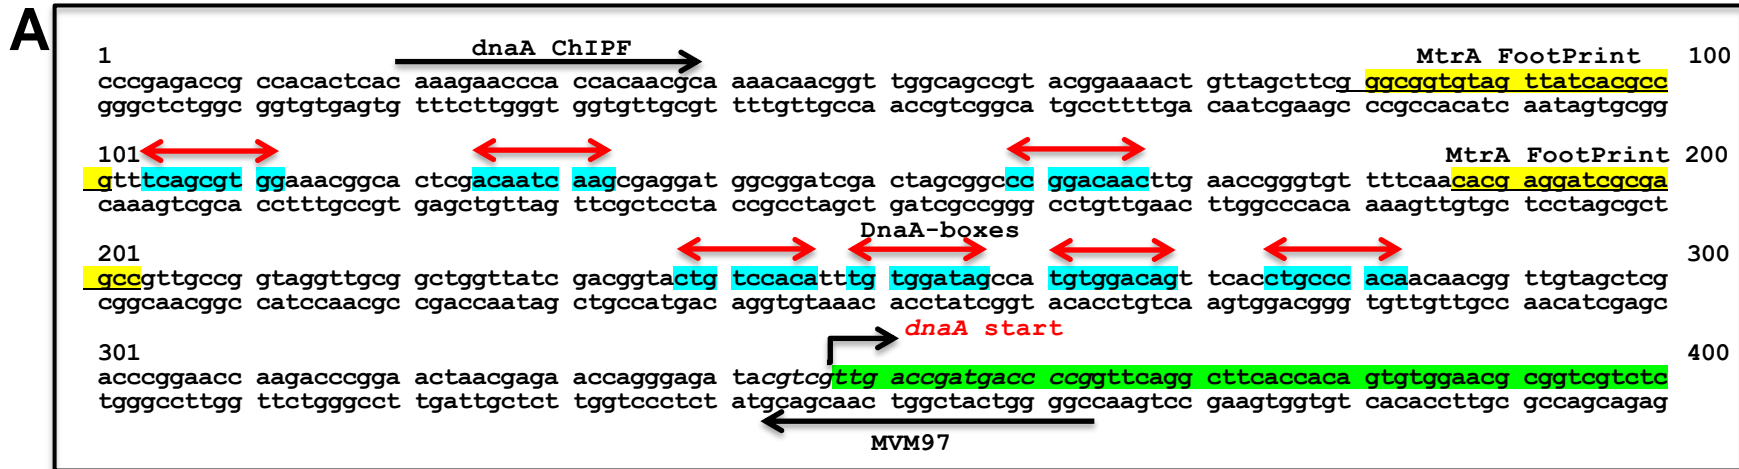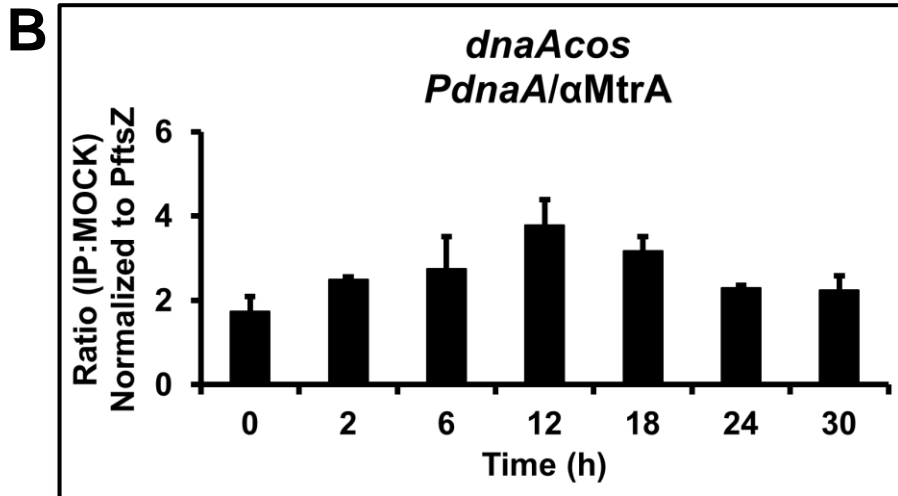

Supplement: NIHMS741553-supplement-Supp_Fig_S4.pdf [file NIHMS741553-supplement-Supp_Fig_S4.pdf]
